# Supplementary material for: Deformability-based microfluidic cell pairing and fusion
Source: Royal Society of Chemistry journal article supplement (doi:10.1039/c4lc00303a), 2014-01-01
Supplement: c4lc00303a1.pdf [file c4lc00303a1.pdf]

## Supplementary Material

### Deformability-based microfluidic cell pairing and fusion

Burak Dura, Yaoping Liu, Joel Voldman

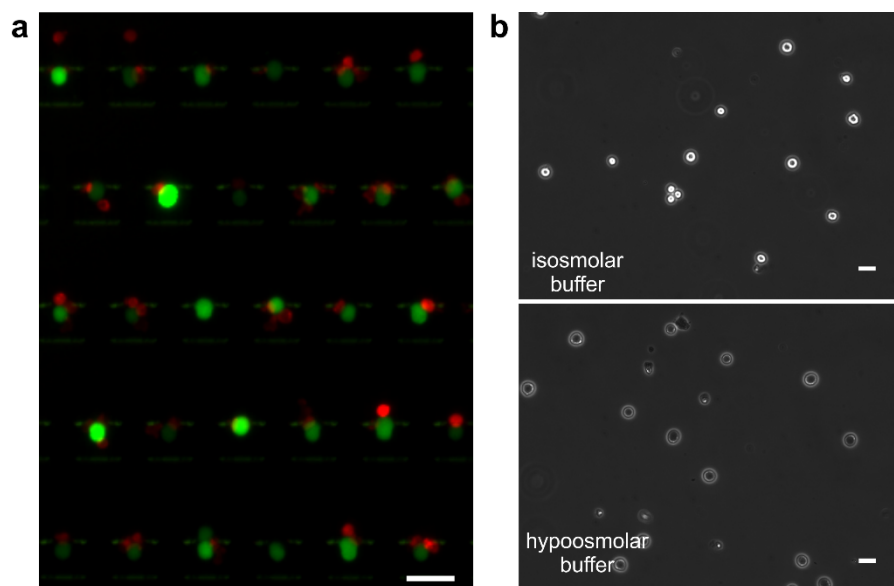

**Supplementary Figure 1:** (a) Pairing of eGFP-expressing NIH3T3 fibroblasts with Turbo RFP-expressing BA/F3 leukocytes using original deformability-based loading protocol without hypoosmolar buffer treatment. Cell capture efficiency was low ( $< 10\%$ ) and mostly more than one BA/F3 cells paired with fibroblasts resulting in multi-cell pairings. (b) Cell size change in BA/F3 mouse leukocytes when exposed to hypoosmolar buffer (Change in diameter  $\sim 1.3 - 1.6\times$ ).
